# Supplementary material for: Composite electrodes with superior catalytic activity in methanol electro-oxidation fabricated using ternary NiO–CuO–ZnO mixed metal oxides
Source: Royal Society of Chemistry journal article supplement (doi:10.1039/d3nj04695h), 2024-01-01
Supplement: d3nj04695h1.pdf [file d3nj04695h1.pdf]

## Supporting Information

### Composite electrodes with superior catalytic activity in methanol electro-oxidation process fabricated using ternary NiO-CuO-ZnO mixed metal oxides

Fatima Hassan<sup>a</sup>, Rabia Naeem<sup>a\*</sup>, Safoora Shabbir<sup>a</sup>, Shahzad Sharif<sup>a</sup>, Muhammad Mushtaq<sup>a</sup>, Rabia Sattar<sup>b,c\*</sup>

<sup>a</sup>Department of Chemistry, Government College University Lahore, 54000, Pakistan

<sup>b</sup>Department of Chemistry, The University of Lahore, Sargodha campus, Pakistan.

<sup>c</sup>University of New South Wales, 2052 NSW Kensington, Sydney, Australia.

Corresponding author: rabianaem@gcu.edu.pk, rabia.sattar@chem.uol.edu.pk.

Table S1: Previously reported synthesis methods and applications of binary mixed metal oxide

| Binary Oxides | Preparation Method  | Precursor Materials                                                                                                                                                            | Applications                                                                        | References |
|---------------|---------------------|--------------------------------------------------------------------------------------------------------------------------------------------------------------------------------|-------------------------------------------------------------------------------------|------------|
| NiO-CuO       | Sol-gel             | Cu (CH <sub>3</sub> COO). H <sub>2</sub> O, CH <sub>3</sub> OH, NiCl <sub>2</sub> , C <sub>2</sub> H <sub>5</sub> OH, NaOH, butyl carbitol acetate (BCA), ethyl cellulose (EC) | Thick film sensor for the acute detection of hydrogen sulfide gas vapors            | 1          |
| NiO/CuO       | Hydrothermal method | CuO, diH <sub>2</sub> O, Ni (NO <sub>3</sub> ) <sub>2</sub> , NH <sub>4</sub> F, Co (NH <sub>2</sub> ) <sub>2</sub>                                                            | Use in supercapacitors                                                              | 2          |
| CuO/NiO       | Biogenic synthesis  | Azardica indica leaf extract, Ni (NO <sub>2</sub> ) <sub>3</sub> .6H <sub>2</sub> O, Cu (NO <sub>2</sub> ) <sub>3</sub> .6H <sub>2</sub> O                                     | Degraded two hazardous water pollutants methylene blue and eosin yellow             | 3          |
| NiO/CuO       | Sol-gel             | CuSO <sub>4</sub> · 5H <sub>2</sub> O, NiSO <sub>4</sub> .6H <sub>2</sub> O, NaOH, acetic acid glacial, Stock solution of Ho, Yb, and Sm                                       | Efficient absorbent for rare earth elements (Ho, Yb, and Sm) from aqueous solutions | 4          |

|         |                                         |                                                                                                                                                                                                                                                                                         |                                                                                                                                                                                              |    |
|---------|-----------------------------------------|-----------------------------------------------------------------------------------------------------------------------------------------------------------------------------------------------------------------------------------------------------------------------------------------|----------------------------------------------------------------------------------------------------------------------------------------------------------------------------------------------|----|
| CuO-NiO | Facile wet-chemical method              | Cu (CH <sub>3</sub> COO) <sub>2</sub> ·H <sub>2</sub> O Ni (CH <sub>3</sub> COO) <sub>2</sub> ·4H <sub>2</sub> O diH <sub>2</sub> O, glycol (C <sub>2</sub> H <sub>6</sub> O <sub>2</sub> ), ammonia water (25%) (NH <sub>3</sub> ·H <sub>2</sub> O), NaOH, CuO or Ni (OH) <sub>2</sub> | anode materials for lithium-ion batteries (LIBs)                                                                                                                                             | 5  |
| CuO-ZnO | Hydrothermal technique                  | Alchornea cordifolia leaves, Zn (CH <sub>3</sub> COO) <sub>2</sub> ·2H <sub>2</sub> O, CuSO <sub>4</sub> ·5H <sub>2</sub> O, Hela cells.                                                                                                                                                | Use as an anticancer by generating reactive oxygen species capable of hampering the multiplication of tumor cells by apoptosis                                                               | 6  |
| CuO/ZnO | Green Biosynthesis                      | Cu(CH <sub>3</sub> COO) <sub>2</sub> ·H <sub>2</sub> O, Zn (CH <sub>3</sub> COO) <sub>2</sub> ·2H <sub>2</sub> O, MB (C <sub>16</sub> H <sub>18</sub> ClN <sub>3</sub> S), <i>Penicillium corylophilum</i> , potato dextrose                                                            | Degradation of organic methylene blue dye                                                                                                                                                    | 7  |
| CuO/ZnO | co-precipitation method                 | CuCl <sub>2</sub> ·2H <sub>2</sub> O, ZnCl <sub>2</sub> ·2H <sub>2</sub> O, diH <sub>2</sub> O, NaOH, absolute ethanol                                                                                                                                                                  | Antifungal activity greater inhibition of strain <i>Aspergillus flavus</i> <i>Trichoderma</i> compared to respective mono oxides                                                             | 8  |
| ZnO/CuO | sol-gel                                 | Zn (NO <sub>3</sub> ) <sub>2</sub> ·6H <sub>2</sub> O, Cu (NO <sub>3</sub> ) <sub>2</sub> ·3H <sub>2</sub> O, polyvinyl alcohol (PVA), absolute ethanol, diH <sub>2</sub> O                                                                                                             | photodegradation of methylene blue (MB) increased three times                                                                                                                                | 9  |
| ZnO-CuO | simple chemical co-precipitation method | ZnCl <sub>2</sub> , CuCl <sub>2</sub> , CTAB, NaOH, dH <sub>2</sub> O                                                                                                                                                                                                                   | The superior antibacterial activity of binary oxide nanocomposite is attributed to oxidative stress generated by the electron transfer pathway and reactive oxygen species (ROS) generation. | 10 |
| ZnO/CuO | co-precipitation method                 | Zn (CH <sub>3</sub> CHOO) <sub>2</sub> ·2H <sub>2</sub> O, NaOH, Cu (CH <sub>3</sub> CHOO) <sub>2</sub> ·2H <sub>2</sub> O, water, water/monohydric alcohol (ethanol),                                                                                                                  | Use in coupled semiconductors                                                                                                                                                                | 11 |

|         |                                   |                                                                                                                                                                                                                                                                                                                       |                                                                                                                                                                                                               |    |
|---------|-----------------------------------|-----------------------------------------------------------------------------------------------------------------------------------------------------------------------------------------------------------------------------------------------------------------------------------------------------------------------|---------------------------------------------------------------------------------------------------------------------------------------------------------------------------------------------------------------|----|
| ZnO/CuO | hydrothermal method.              | water/dihydric alcohol (ethane-1, 2-diol) zinc acetate and copper nitrate, deionized water as a solvent, hexamethylenetetramine (HMT) as an alkali source                                                                                                                                                             | Magnetic measurements showed composites possessed room-temperature ferromagnetism with the increase of CuO content in the composites. ZnO/CuO displayed the coexistence of ferromagnetism and para-magnetism. | 12 |
| ZnO-NiO | Sol-gel and spin-coating methods  | Zn (CH <sub>3</sub> COO) <sub>2</sub> ·2H <sub>2</sub> O, 2-methoxy ethanol (C <sub>3</sub> H <sub>8</sub> O <sub>2</sub> ), diethanolamine (MEA), nickel acetate tetrahydrate (C <sub>4</sub> H <sub>6</sub> NiO <sub>4</sub> ·4H <sub>2</sub> O), 2-methoxy ethanol (C <sub>3</sub> H <sub>8</sub> O <sub>2</sub> ) | Gas detection, UV detectors, photodiodes                                                                                                                                                                      | 13 |
| NiO-ZnO | co-precipitation/co-gel formation | KOH, H <sub>2</sub> C <sub>2</sub> O <sub>4</sub> , Na <sub>2</sub> CO <sub>3</sub> , Ni (NO <sub>3</sub> ) <sub>2</sub> ·6H <sub>2</sub> O, Zn (NO <sub>3</sub> ) <sub>2</sub> ·6H <sub>2</sub> O, H <sub>2</sub> O                                                                                                  | maximum activity for the decolorization of both the dyes and the decolorization rate of methylene blue and methyl orange                                                                                      | 14 |
| NiO/ZnO | Hydrothermal synthesis            | Zn (NO <sub>3</sub> ) <sub>2</sub> ·6H <sub>2</sub> O, Ni (NO <sub>3</sub> ) <sub>2</sub> ·6H <sub>2</sub> O, urea (CO(NH <sub>2</sub> ) <sub>2</sub> ), KOH                                                                                                                                                          | electrode material for supercapacitors with the highest specific capacitance                                                                                                                                  | 15 |
| NiO-ZnO | chemical co-precipitation         | Zn(NO <sub>3</sub> ) <sub>2</sub> ·6H <sub>2</sub> O, Ni(NO <sub>3</sub> ) <sub>2</sub> ·6H <sub>2</sub> O, NaOH, diH <sub>2</sub> O, ethanol                                                                                                                                                                         | bactericidal agents against pathogenic bacterial species                                                                                                                                                      | 16 |
| NiO/ZnO | aqueous chemical growth method    | Nickel acetate tetrahydrate, methanol, zinc acetate dihydrate, ethanol, boric acid, sodium dihydrogen phosphate, NaCl, KCl, stock solution of CBZ, Britton-Robinson buffer (BRB)                                                                                                                                      | electrochemical sensor in different pharmaceutical formulations with acceptable percent recoveries                                                                                                            | 17 |

|         |                           |                                                                                                                                               |                                                                                                                                                   |    |
|---------|---------------------------|-----------------------------------------------------------------------------------------------------------------------------------------------|---------------------------------------------------------------------------------------------------------------------------------------------------|----|
| ZnO-NiO | Homogeneous precipitation | Zn(NO <sub>3</sub> ) <sub>2</sub> ·6H <sub>2</sub> O, Ni(NO <sub>3</sub> ) <sub>2</sub> ·6H <sub>2</sub> O, SDS, HMT, dH <sub>2</sub> O, NaOH | nanocomposites provide an opportunity for band tuning for better functional performance for device fabrication compared to the basic metal oxides | 18 |
|---------|---------------------------|-----------------------------------------------------------------------------------------------------------------------------------------------|---------------------------------------------------------------------------------------------------------------------------------------------------|----|

Table S2: Previously reported synthesis methods and applications of ternary mixed metal oxide

| <b>Ternary Oxides</b>     | <b>Preparation Method</b>                                 | <b>Precursor Materials</b>                                                                                                                                                                  | <b>Applications</b>                               | <b>References</b> |
|---------------------------|-----------------------------------------------------------|---------------------------------------------------------------------------------------------------------------------------------------------------------------------------------------------|---------------------------------------------------|-------------------|
| NiO/CuO/ZnO               | Hydrothermal                                              | Zn (CH <sub>3</sub> COO) <sub>2</sub> ·2H <sub>2</sub> O, NiSO <sub>4</sub> ·6H <sub>2</sub> O, Cu (NO <sub>3</sub> ) <sub>2</sub>                                                          | photovoltaic use                                  | 19                |
| NiO/CuO/ZnO               | Co-precipitation & hydrothermal                           | CuCl <sub>2</sub> ·2H <sub>2</sub> O, ZnCl <sub>2</sub> , NiCl <sub>2</sub> ·6H <sub>2</sub> O                                                                                              | Use in semiconducting devices                     | 20                |
| CuO-NiO-ZnO               | Co-precipitation                                          | Zn (NO <sub>3</sub> ) <sub>2</sub> ·6H <sub>2</sub> O, Ni (NO <sub>3</sub> ) <sub>2</sub> ·6H <sub>2</sub> O, CuCl <sub>2</sub> ·2H <sub>2</sub> O                                          | sensor, photonic, and optoelectronic applications | 21                |
| CuO-NiO-ZnO               | Green synthesis                                           | Aqueous leaf extract of the Rheum ribes                                                                                                                                                     | Catalytic activity and selectivity                | 22                |
| ZnO-NiO-CuO               | Gel combustion process                                    | Zn (NO <sub>3</sub> ) <sub>2</sub> ·6H <sub>2</sub> O, Ni (NO <sub>3</sub> ) <sub>2</sub> ·6H <sub>2</sub> O, Cu (NO <sub>3</sub> ) <sub>2</sub> ·6H <sub>2</sub> O                         | Electrode synthesis                               | 23                |
| ZnO-NiO/graphene          | hydrothermal synthesis                                    | GO, Zn(Ac) <sub>2</sub> ·2H <sub>2</sub> O, Ni(Ac) <sub>2</sub> ·4H <sub>2</sub> O, glycine, NH <sub>4</sub> HCO <sub>3</sub>                                                               | anode materials for lithium-ion battery           | 24                |
| CuO-MnO-2TiO <sub>2</sub> | Aerosol-assisted chemical vapor deposition (AACVD) method | Cu (CH <sub>3</sub> COO) <sub>2</sub> ·2H <sub>2</sub> O, Mn (CH <sub>3</sub> COO) <sub>2</sub> , Ti(O(CH <sub>2</sub> ) <sub>3</sub> CH <sub>3</sub> ) <sub>4</sub> , trifluoroacetic acid | photoelectrochemical studies                      | 25                |

---

(TFA).

---

|                                                       |                                   |                                                                                                                                                                                                                                                                                     |                                                                              |    |
|-------------------------------------------------------|-----------------------------------|-------------------------------------------------------------------------------------------------------------------------------------------------------------------------------------------------------------------------------------------------------------------------------------|------------------------------------------------------------------------------|----|
| Co <sub>3</sub> O <sub>4</sub> /NiO/MnO <sub>2</sub>  | hydrothermal & precipitation      | CoCl <sub>2</sub> ·6H <sub>2</sub> O, NaCl, HMT, ethanol, KMnO <sub>4</sub> , HCl                                                                                                                                                                                                   | Decrease resistance and enhance capacitance                                  | 26 |
| CuPtPd (Dentritic)                                    | Directly reducing metal ions      | Metals                                                                                                                                                                                                                                                                              | electrocatalytic & anti-poisoning activity towards the oxidation of methanol | 27 |
| CuO-ZnO/rGO                                           | Precipitation                     | H <sub>2</sub> SO <sub>4</sub> , graphite flakes, H <sub>3</sub> PO <sub>4</sub> , KMnO <sub>4</sub> , HCl, H <sub>2</sub> O <sub>2</sub> , NaOH, & ammonia solution, (Zn (NO <sub>3</sub> ) <sub>2</sub> ·6H <sub>2</sub> O, Cu (NO <sub>3</sub> ) <sub>2</sub> ·3H <sub>2</sub> O | NO <sub>2</sub> gas sensors                                                  | 28 |
| CuO/Co <sub>3</sub> O <sub>4</sub> -CeO <sub>2</sub>  | Co-precipitation                  | Cu(NO <sub>3</sub> ) <sub>2</sub> ·3H <sub>2</sub> O, Co(NO <sub>3</sub> ) <sub>2</sub> ·6H <sub>2</sub> O, Ce(NO <sub>3</sub> ) <sub>3</sub> ·6H <sub>2</sub> O, Co <sub>3</sub> O <sub>4</sub> -CeO <sub>2</sub>                                                                  | enhance the H <sub>2</sub> Oxidation                                         | 29 |
| Au-Cu-Pt                                              | Electrodeposition                 | HAuCl <sub>4</sub> , H <sub>2</sub> PtCl <sub>6</sub> CH <sub>3</sub> OH, H <sub>2</sub> SO <sub>4</sub> , CuSO <sub>4</sub>                                                                                                                                                        | Methanol fuel cell (DMFC)                                                    | 30 |
| Cu <sub>2</sub> O/ZnO/Ag <sub>3</sub> PO <sub>4</sub> | Co-precipitation                  | CuCl <sub>2</sub> ·2H <sub>2</sub> O, NaOH, (Ag <sub>3</sub> PO <sub>4</sub> ), Na <sub>2</sub> HPO <sub>4</sub> ·12H <sub>2</sub> O, ZnSO <sub>4</sub> ·7H <sub>2</sub> O                                                                                                          | Enhance photocatalytic activity                                              | 31 |
| Pt-ZnO-Bi <sub>2</sub> O <sub>3</sub>                 | Hydrothermal Method               | Bi (NO <sub>3</sub> ) <sub>3</sub> ·5H <sub>2</sub> O, Zn(CH <sub>3</sub> COO) <sub>2</sub> ·6H <sub>2</sub> O, Glycerol                                                                                                                                                            | Anode-catalytic oxidation of methanol in alkali                              | 32 |
| CuO-SnO <sub>2</sub> -ZnO                             | RF magnetron sputtering technique | pure CuO, SnO <sub>2</sub> & ZnO powders, polyvinyl alcohol,                                                                                                                                                                                                                        | films used in the detection of NH <sub>3</sub> at room temperature           | 33 |

---

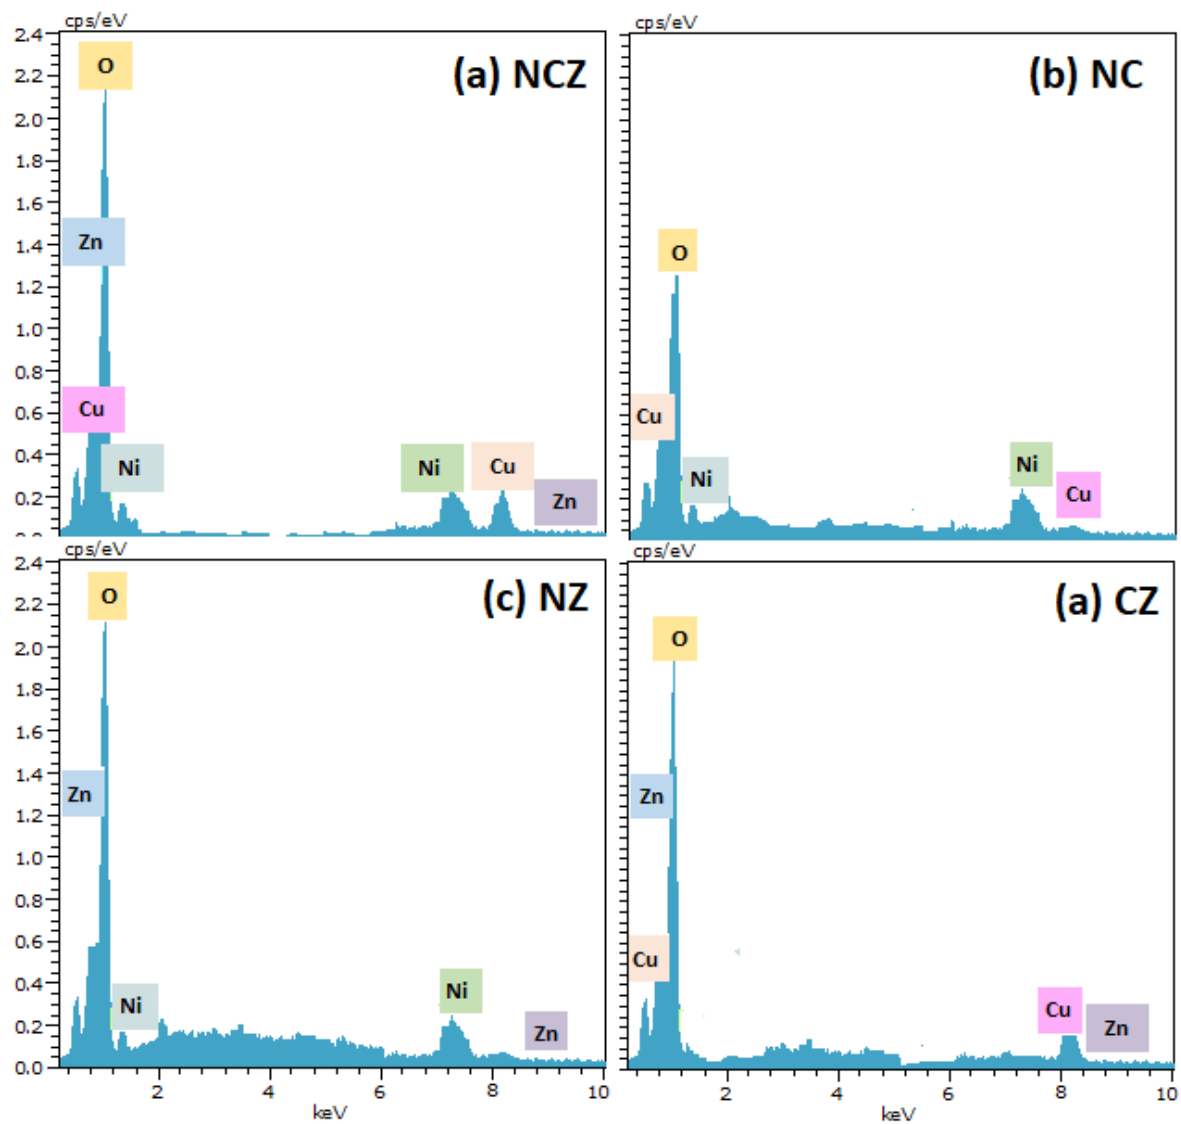

Figure S1: EDX spectra of NCZ, NZ, CZ, and NC mixed metal oxides composites.

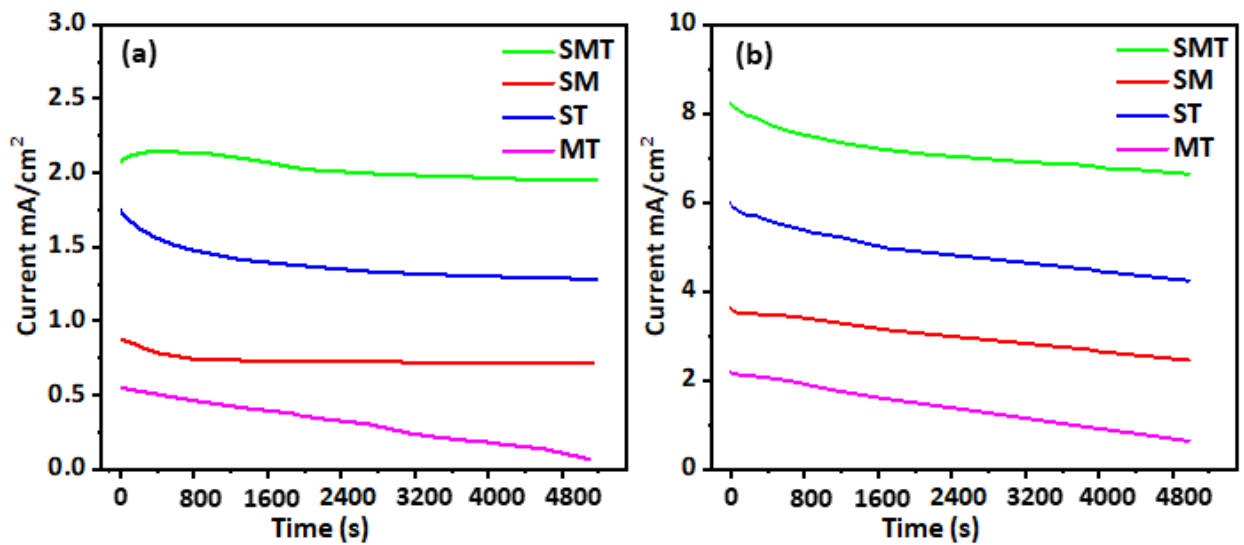

Figure S2: Chronoamperometric plot of Binary and ternary composite electrodes for 80 minutes in (a) acidic and (b) basic medium

### Methanol Oxidation Reaction (MOR) mechanism in acidic media

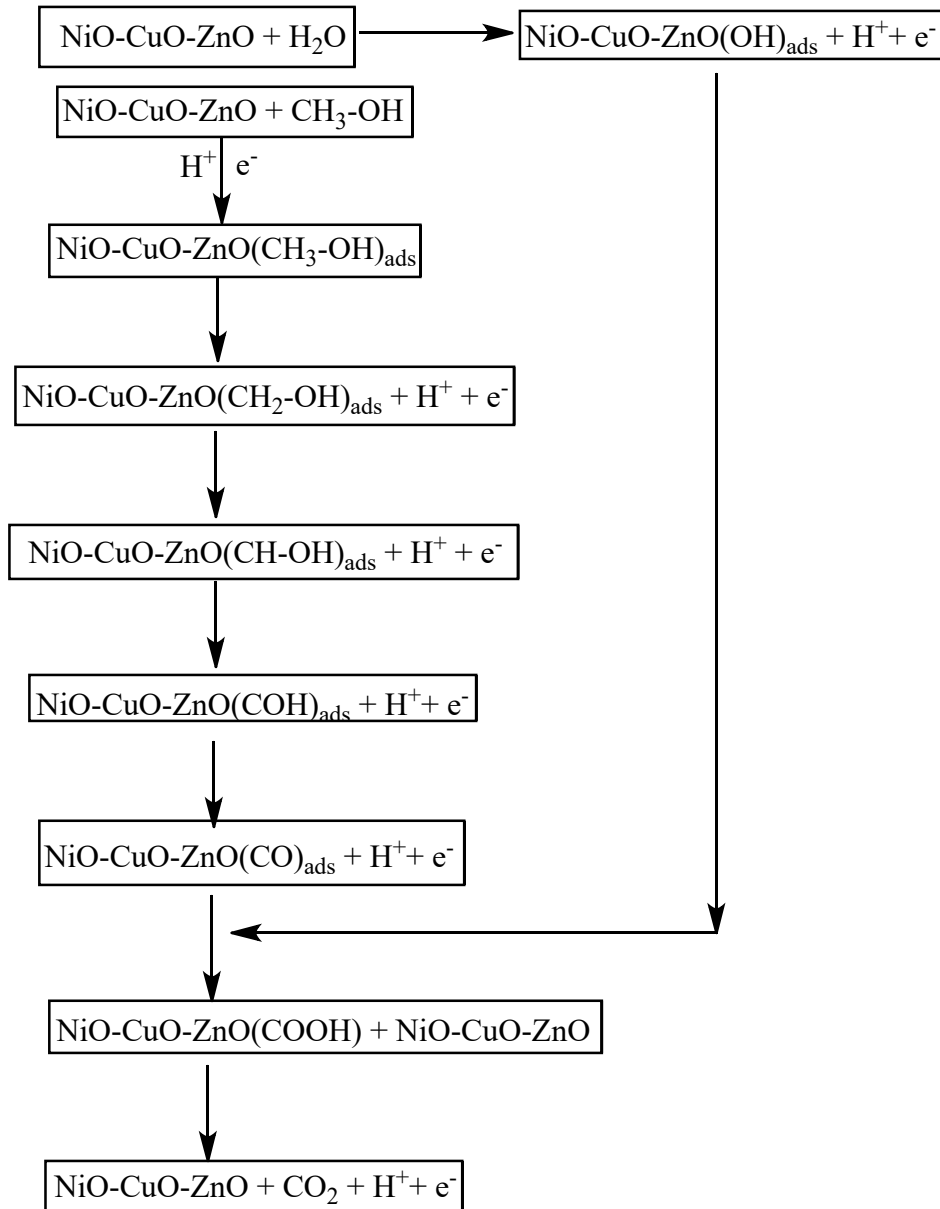

### Acidic media

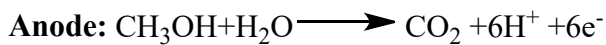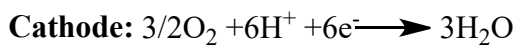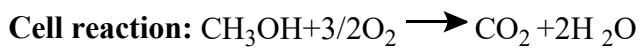

### Methanol Oxidation Reaction (MOR) mechanism in basic media



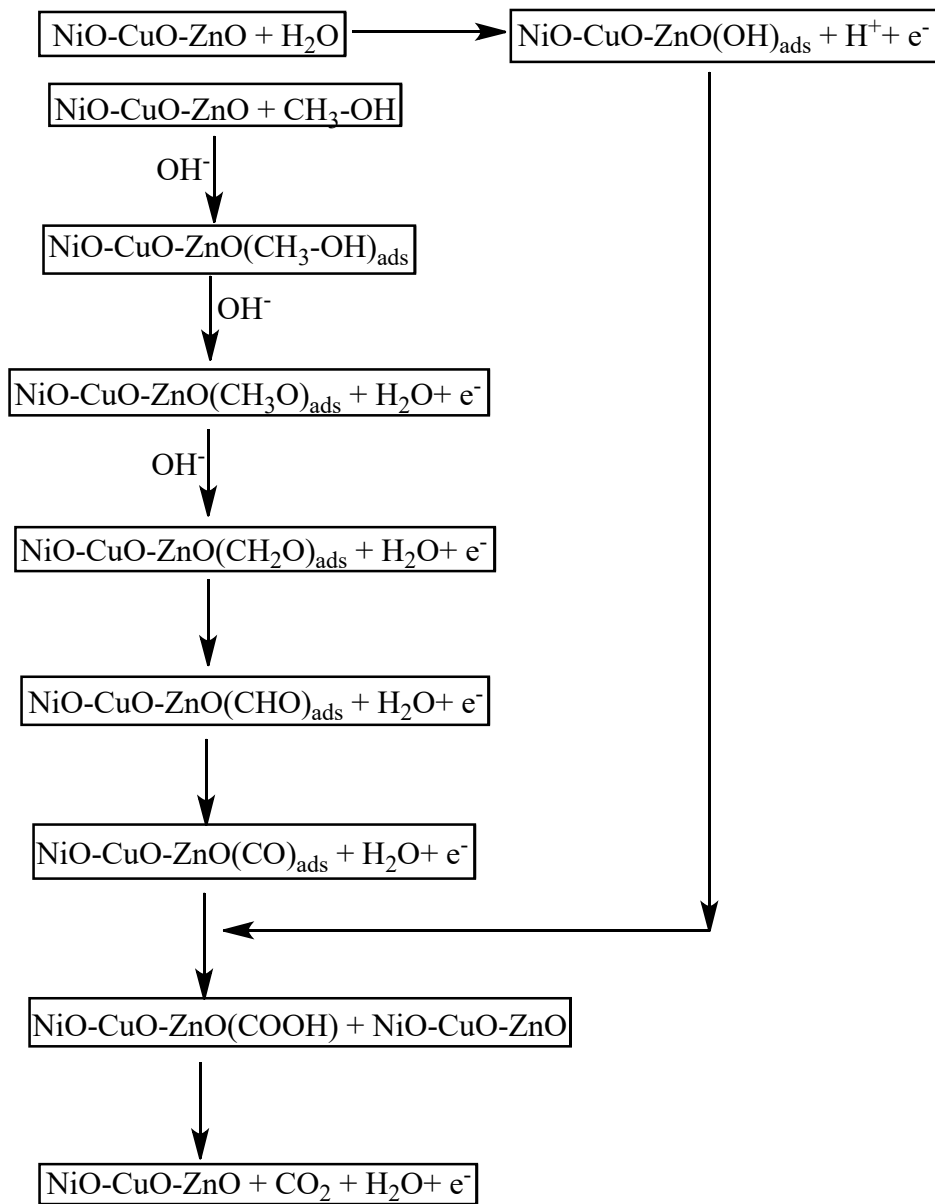

### Basic media

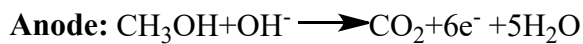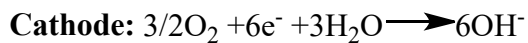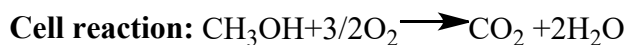

**Methanol oxidation reaction (MOR) mechanism<sup>34, 35</sup>**

## References

1. U. J. Tupe, M. S. Zambare, A. V. Patil and P. B. Koli, *Material Science Research India*, 2020, **17**, 260-269.
2. M. Huang, F. Li, Y. X. Zhang, B. Li and X. Gao, *Ceramics International*, 2014, **40**, 5533-5538.
3. L. Arun, C. Karthikeyan, D. Philip and C. Unni, *Journal of Physics and Chemistry of Solids*, 2020, **136**, 109155.
4. M. Shehata, W. Youssef, H. Mahmoud and A. Masoud, *Russian Journal of Inorganic Chemistry*, 2020, **65**, 279-289.
5. H. Chen, C. L. Li, N. Li, K. X. Xiang and Z. L. Hu, *Micro & Nano Letters*, 2013, **8**, 544-548.
6. E. E. Elemike, D. C. Onwudiwe and M. Singh, *Journal of Inorganic and Organometallic Polymers and Materials*, 2020, **30**, 400-409.
7. A. Fouda, S. S. Salem, A. R. Wassel, M. F. Hamza and T. I. Shaheen, *Heliyon*, 2020, **6**, e04896.
8. K. Phiwdang, M. Phensaijai and W. Pecharapa, 2013.
9. A. Lavin, R. Sivasamy, E. Mosquera and M. J. Morel, *Surfaces and Interfaces*, 2019, **17**, 100367.
10. T. Jan, S. Azmat, Q. Mansoor, H. Waqas, M. Adil, S. Ilyas, I. Ahmad and M. Ismail, *Microbial pathogenesis*, 2019, **134**, 103579.
11. J. Gajendiran and V. Rajendran, *Materials Letters*, 2014, **116**, 311-313.
12. W. Wang, L. Xu, R. Zhang, J. Xu, F. Xian, J. Su and F. Yang, *Chemical Physics Letters*, 2019, **721**, 57-61.
13. S. Thamri, I. Sta, M. Jlassi, M. Hajji and H. Ezzaouia, *Materials Science in Semiconductor Processing*, 2017, **71**, 310-320.
14. A. Hameed, T. Montini, V. Gombac and P. Fornasiero, *Photochemical & Photobiological Sciences*, 2009, **8**, 677-682.
15. D. Zhu and Y. Shao, *Int J Electrochem Sci*, 2018, **13**, 3601-3612.
16. S. Thambidurai, P. Gowthaman, M. Venkatachalam and S. Suresh, *Journal of Alloys and Compounds*, 2020, **830**, 154642.
17. S. Yasmeen, F. Iqbal, T. Munawar, M. A. Nawaz, M. Asghar and A. Hussain, *Ceramics International*, 2019, **45**, 17859-17873.
18. N. Qambrani, J. A. Buledi, N. H. Khand, A. R. Solangi, S. Ameen, N. S. Jalbani, A. Khatoon, M. A. Taher, F. Moghadam and M. Shojaei, *Chemosphere*, 2022, **303**, 135270.
19. S. Joshi, M. Mudigere, L. Krishnamurthy and G. Shekar, *Chemical Papers*, 2014, **68**, 1584-1592.
20. M. Srinivasan and N. Punithavelan, *Materials Research Express*, 2018, **5**, 075033.
21. A. O. Juma, E. A. Arbab, C. M. Muiva, L. M. Lepodise and G. T. Mola, *Journal of alloys and compounds*, 2017, **723**, 866-872.
22. M. Atarod, J. Safari and H. Tebyanian, *Synthetic Communications*, 2020, **50**, 1993-2006.
23. R. Packiaraj, K. Mahendraprabhu, P. Devendran, N. Nallamuthu, B. Palanivel, K. Venkatesh and R. Karuppanan, *Energy & Fuels*, 2021, **36**, 603-617.
24. Y. Huang, X. Chen, K. Zhang and X. Feng, *Ceramics International*, 2015, **41**, 13532-13540.
25. K. Munawar, M. A. Mansoor, W. J. Basirun, M. Misran, N. M. Huang and M. Mazhar, *RSC advances*, 2017, **7**, 15885-15893.
26. L. Su, Y. Wang, Y. Sha and M. Hao, *Journal of Alloys and Compounds*, 2016, **656**, 585-589.
27. X. Shi, Y. Wen, X. Guo, Y. Pan, Y. Ji, Y. Ying and H. Yang, *ACS Applied Materials & Interfaces*, 2017, **9**, 25995-26000.

28. G. D. Varma, *Materials Research Express*, 2018, **6**, 035011.
29. Y. Chen, D. Liu, L. Yang, M. Meng, J. Zhang, L. Zheng, S. Chu and T. Hu, *Chemical Engineering Journal*, 2013, **234**, 88-98.
30. C. Wang, F. Ren, C. Zhai, K. Zhang, B. Yang, D. Bin, H. Wang, P. Yang and Y. Du, *RSC Advances*, 2014, **4**, 57600-57607.
31. A. M. Tadesse, M. Alemu and T. Kebede, *Journal of Environmental Chemical Engineering*, 2020, **8**, 104356.
32. K. K. Bera, M. Chakraborty, S. R. Chowdhury, A. Ray, S. Das and S. K. Bhattacharya, *Electrochimica Acta*, 2019, **322**, 134775.
33. S. Cynthia, R. Sivakumar and C. Sanjeeviraja, *Optik*, 2021, **234**, 166615.
34. T. Noor, S. Pervaiz, N. Iqbal, H. Nasir, N. Zaman, M. Sharif and E. Pervaiz, *Nanomaterials*, 2020, **10**, 1601.
35. L. Yaqoob, T. Noor and N. Iqbal, *International Journal of Energy Research*, 2021, **45**, 6550-6583.
